# Supplementary material for: Origins of Ripples in CVD-Grown Few-layered MoS2 Structures under Applied Strain at Atomic Scales
Source: PubMed Central journal article supplement (PMC5244384; doi:10.1038/srep40862), 2017-01-19
Supplement: srep40862-s1.pdf [file srep40862-s1.pdf]

SUPPLEMENTAL FIGURES AND FIGURE CAPTIONS

**Title: Origins of Ripples in CVD-Grown Few-layered MoS<sub>2</sub> Structures under Applied Strain at Atomic Scales**

**Authors:** Jin Wang<sup>1</sup>, Raju R. Namburu<sup>2</sup>, Madan Dubey<sup>3</sup>, and Avinash M. Dongare<sup>1,\*</sup>

1 Department of Materials Science and Engineering and Institute of Materials Science, University of Connecticut, Storrs, Connecticut 06269, USA

2 Computational and Information Sciences Directorate, U.S. Army Research Laboratory, Aberdeen Proving Ground, Maryland 21005, USA

3 Sensors and Electron Devices Directorate, U.S. Army Research Laboratory, Adelphi, Maryland 20783, USA

**\* Corresponding Author:**

Avinash M. Dongare

Materials Science and Engineering, University of Connecticut,  
Storrs, CT-06084

Email: [dongare@uconn.edu](mailto:dongare@uconn.edu)

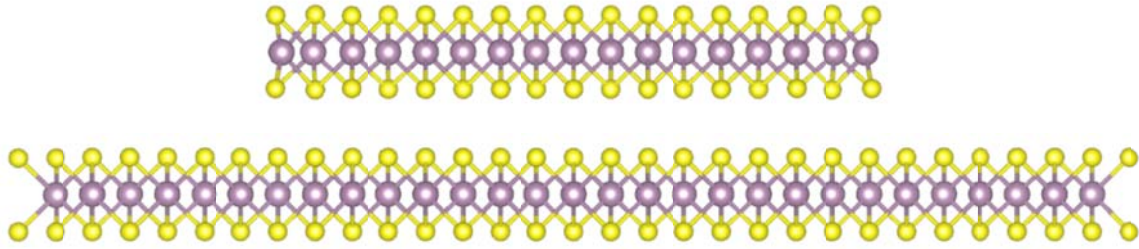

**Figure S1:** Schematic show of the bilayer supercell used in this study.

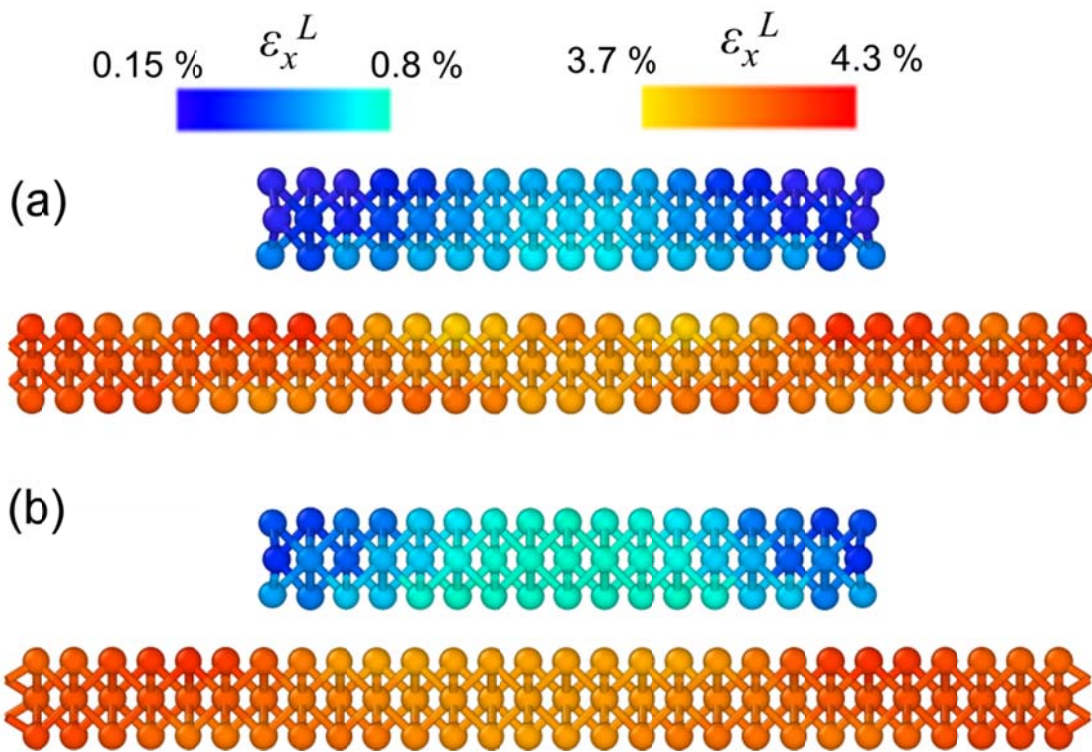

**Figure S2:** Comparison of (a) DFT and (b) MD in local strain ( $\epsilon_x^L$ ) map of a bilayer MoS<sub>2</sub> system under an applied uniaxial strain  $\epsilon_x=4\%$ .

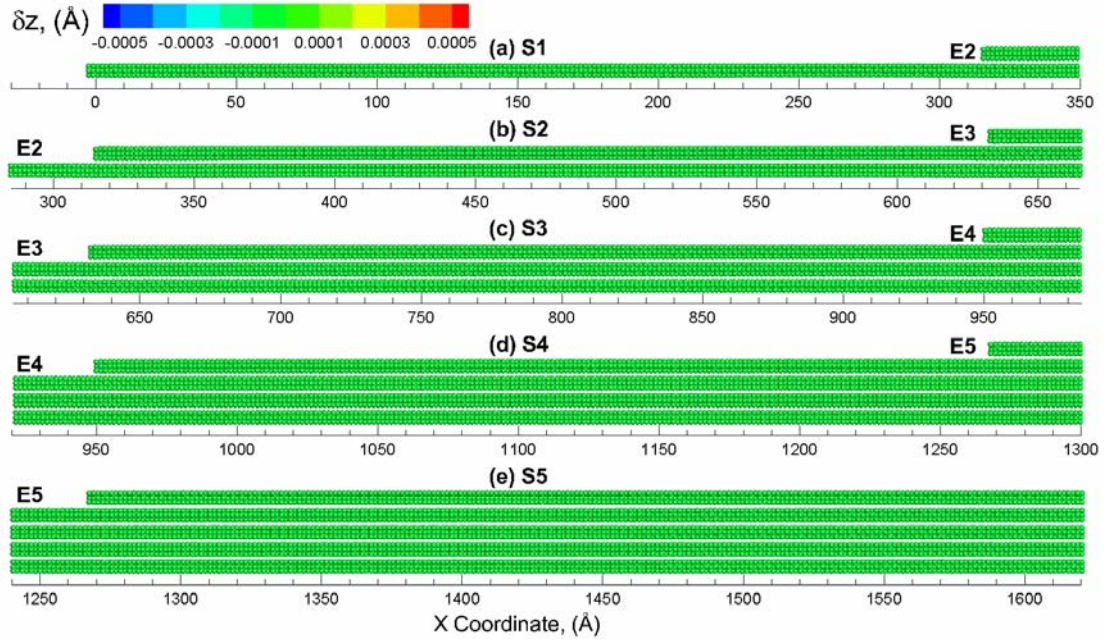

**Figure S3:** The vertical displacement map in the unstrained configuration at different sections: (a) S1, (b) S2, (c) S3, (d) S4 and (e) S5. The atoms are colored by the displacement in the Z direction with the positive value (red color) corresponding to an upward displacement and a negative value (blue) indicating a downward displacement as compared to the unstrained configuration.

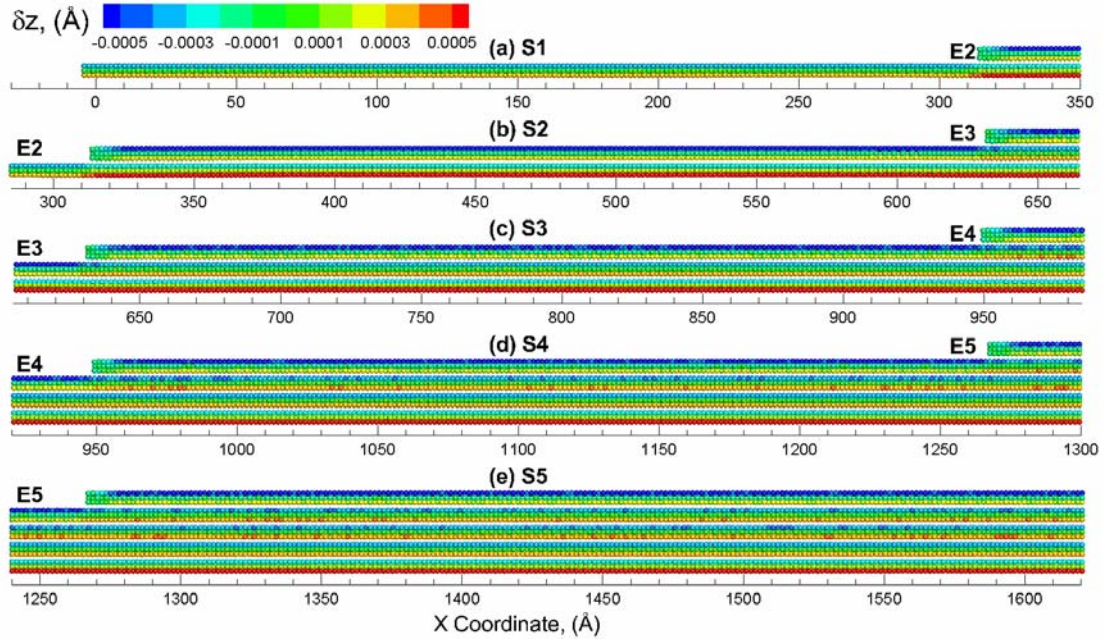

**Figure S4:** The variation of the vertical displacement in the various sections (a) S1, (b) S2, (c) S3, (d) S4 and (e) S5 of the multilayered structure at an applied strain of  $\varepsilon_x = 0.1$  %. The atoms are colored by the displacement in the Z direction with the positive value (red color) corresponding to an upward displacement and a negative value (blue) indicating a downward displacement as compared to the unstrained configuration.

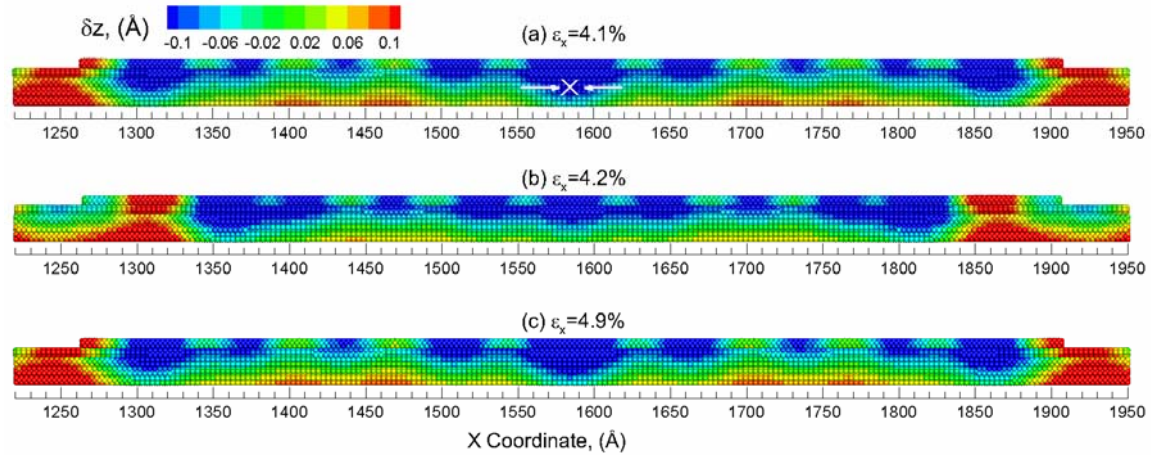

**Figure S5:** Snapshots of center of pyramid system at various strains (a)  $\epsilon_x = 4.1\%$ , (b)  $\epsilon_x = 4.2\%$  and (c)  $\epsilon_x = 4.9\%$  showing propagation of ripples at the edge region. The atoms are colored by the displacement in the Z direction with the positive value (red color) corresponding to an upward displacement and a negative value (blue) indicating a downward displacement as compared to the unstrained configuration.

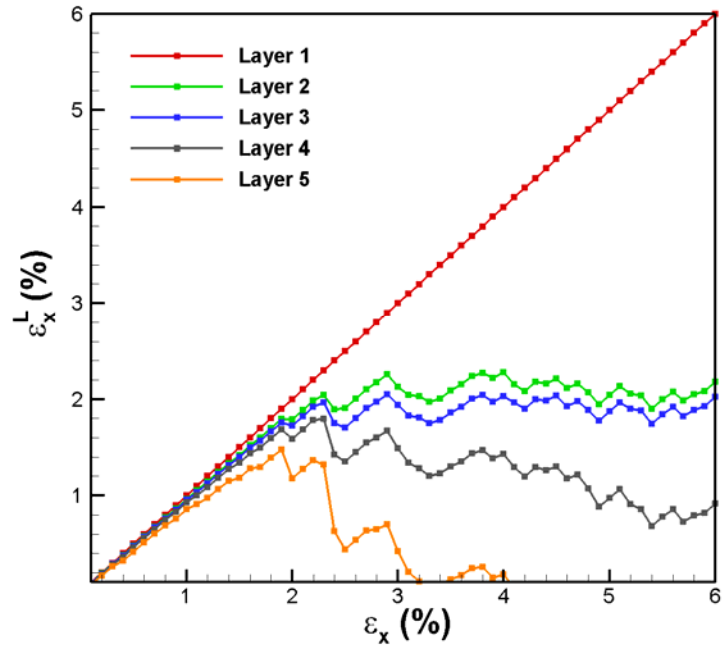

(a)

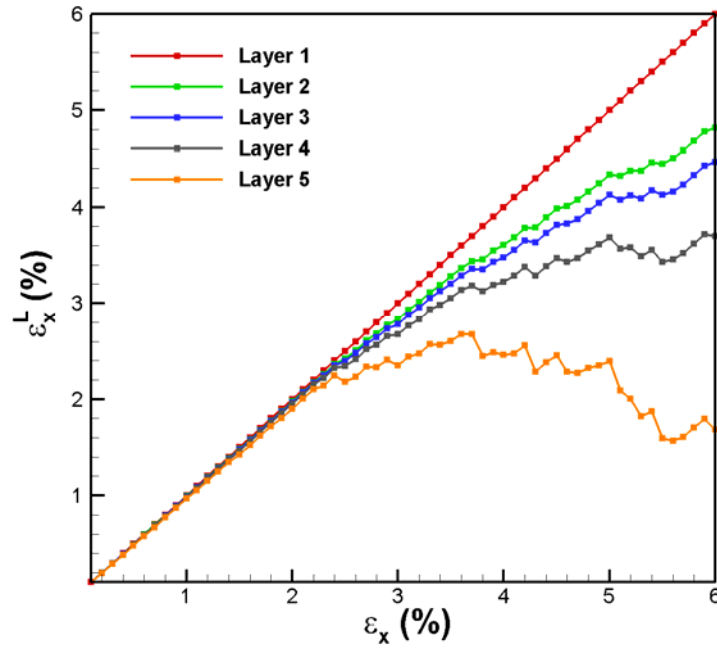

(b)

**Figure S6:** Local layer strain  $\varepsilon_x^L$  as a function of applied strain  $\varepsilon_x$  for (a) 127 nm, (b) 634 nm as-grown multilayered MoS<sub>2</sub> structure under uniaxial tensile strain.
